# Supplementary material for: An Integrated Electrochemical Platform Based on Ti 3 C 2 -Ag NPs and 3D- Printed Microfluidics for Simultaneous Detection of PSA and PSMA
Source: Research Square preprint supplement (doi:10.21203/rs.3.rs-7470190/v1), 2025-09-11
Supplement: Supplementary file 1 [file 3599717fa01a1e92435e9832.docx]

**Supporting information**

**An Integrated Electrochemical Platform Based on Ti3C2-Ag NPs and 3D-Printed Microfluidics for Simultaneous Detection of PSA and PSMA**

**Song-Song Yanga, Lu Hana,*, Wu-Lin Xina, He-Qing Caia, Xin-Yu Xuea, Zhi-Cheng Suna, Kun Hua, Lei Wang** b**,*, Peng Liuc,***

a Department of printing and packaging, Beijing Institute of Graphic Communication, Beijing 102600, China

b Department of urology, Peking university shougang hospital, Beijing 100144, China

C Xiyuan Hospital, China Academy of Chinese Medical Sciences, Beijing 100089, China

[hanlu@iccas.ac.cn](mailto:hanlu@iccas.ac.cn); [wanglei_09243633@163.com](mailto:wanglei_09243633@163.com); drliupeng@sina.cn

**2.4 Characterization of Ti3C2 and Ti3C2-Ag NPs nanocomposites**

To measure their electrical conductivity, the Ti3C2 and Ti3C2-Ag NPs suspensions were uniformly coated onto slides using a spin coater (Easycoater 4, Schwan technology, USA). The surface resistance and thickness of the conductive patterns created with Ti3C2 and Ti3C2-Ag NPs were determined using a four-point probe resistivity measurement system (RTS-9, Guangzhou, China) and a Surface Profiler (Dektak 150, Veeco, USA). The conductivity (κ) was calculated using the equation κ=1/(R·W), where R represents the square resistance (Ώ) and W represents the thickness of the films (cm).

**2.5 Construction of the dual-channel label-free** **EIs**

The fabrication process of the EIs is shown in the Fig. S1. Initially, silver paste was screen-printed onto a PET film to serve as the reference electrode. Subsequently, carbon paste was screen-printed onto the silver layer to act as the working and auxiliary electrodes. Finally, insulating ink was screen-printed onto both the carbon paste layer and silver paste layer. Each layer was dried at 120 ℃ for 60 min, 60 min, and 30 min, respectively. To enhance the adhesion between the electrode surfaces and the 3D printed mold, the insulating ink was mixed with PDMS in a 3:1 ratio.

The 3D printed mold was fabricated using SLA 3D printing technology. The design of 3D printed mold was created using 3D max software, taking into consideration the shape and dimensions of the dual working electrodes. 3D printed mold consists of a rectangular frame and two interconnected cylinders, securely held together by a cuboid at the base. Subsequently, the 3D printed mold was carefully positioned onto the surface of the dual working electrodes, and PDMS was poured into the mold. The PDMS-filled mold was then dried at 120 ℃ for 40 min. Finally, the 3D printed mold was gently removed, resulting in the successful formation of the liquid tank for the dual working electrodes. Subsequently, Ti3C2-Ag NPs nanocomposites (3 µL, 150 µg·mL-1) were injected into the dual tanks through an "inlet" and incubated for 3 hours. Excess nanocomposites were then drained through an "outlet" and the tanks were washed with PBS (0.01 M) using microfluidic technology. Next, Anti-PSA and Anti-PSMA solutions (1:1,000, v/v) were injected into the Anti-PSA(a) and Anti-PSMA(b) tanks, respectively. The working electrode surfaces were allowed to naturally dry for 3 hours and then washed with PBS (0.01 M). Finally, BSA (1 %) was added to the dual liquid tanks and incubated for 3 hours to eliminate nonspecific binding between PSA (or PSMA) and the electrode surface. The tanks were then washed with PBS (0.01 M) and left to dry for 3 hours. The fabricated dual-channel label-free EIs were stored in a refrigerator at 4 ℃ overnight.

**
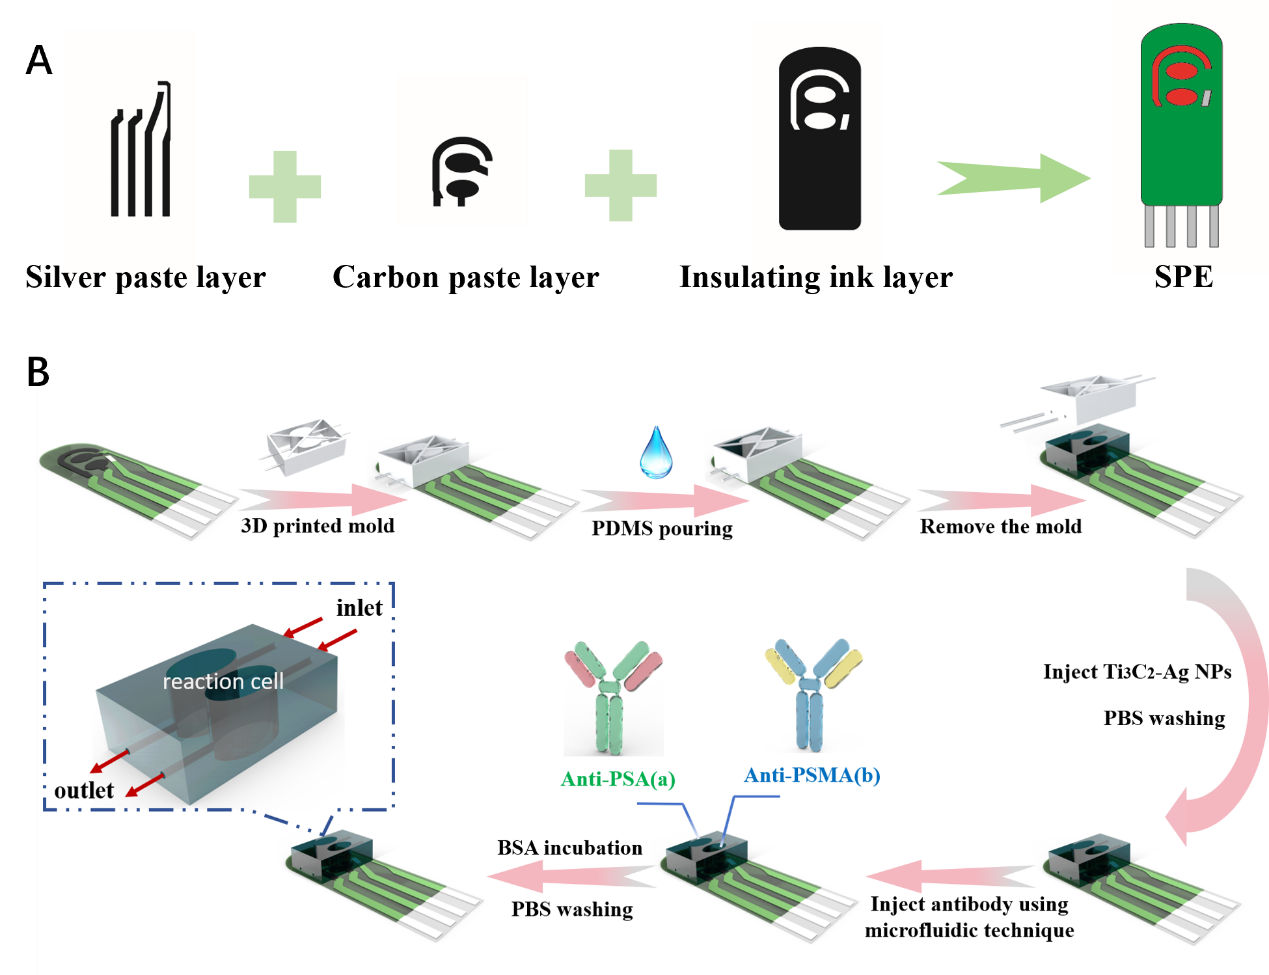
**

**Fig. S1** Fabrication procedure of the SPEs (A) and the dual-channel label-free EIs for simultaneous detection of PSA and PSMA (B)

**2.7 Detection of PSA and PSMA in clinical samples**

Peripheral venous blood was collected from male participants (1 healthy donor, 3 biopsy-confirmed prostate cancer patients) under institutional ethics approval. Whole blood samples were centrifuged at 4000 rpm for 10 min to isolate serum, with aliquots stored at 4°C prior to analysis. For electrochemical measurements, 3 µL of 1:10 PBS-diluted serum was applied to antigen-specific working electrodes. The dilution factor (1:10) was optimized to minimize matrix interference without compromising detection sensitivity. Following a 30-min incubation at 37°C to facilitate antibody-antigen binding, unbound components were removed via three PBS wash cycles. Finally, CV was performed using an electrochemical workstation with the conventional three electrode configuration and scanning parameters mentioned above. This standardized protocol ensured reproducible quantification. Crucially, the dual-channel design enabled simultaneous PSA/PSMA analysis under identical experimental conditions, eliminating inter-assay variability inherent to sequential single-analyte approaches.

**3.1 Characterization of Ti3C2 nanosheets**

The UV-vis spectrum of the synthesized Ti3C2 nanosheets (Fig. S2A) exhibited characteristic absorption bands at 256 nm and a broad absorption range of 700-800 nm, which are indicative of the bandgap energy of Ti3C2 nanosheets ([Chen et al., 2020](#_ENREF_7)). In Fig. S2B, the synthesized Ti3C2 showed a prominent peak at 3480 cm-1, indicating the presence of abundant hydroxyl groups on the surface of the Ti3C2 nanosheets. The XRD pattern of the Ti3AlC2 and synthesized Ti3C2 is shown in Fig. S2C. The XRD pattern of the Ti3AlC2 sample matched well with the reported Ti3AlC2 (PDF No. 52-0875). Importantly, after exfoliation, the XRD peaks for Ti3C2 exhibited broadening and a significant loss of crystallinity due to the removal of "Al". The (104) peak of Ti3C2 disappeared and the (002) peak shifted from 9.6° to 5.9°, indicating the occurrence of delamination processes and the successful conversion of Ti3AlC2 into Ti3C2 ([Ding et al., 2017](#_ENREF_9); [Pandey et al., 2018](#_ENREF_38)). The Raman spectrum of the Ti3AlC2 and synthesized Ti3C2 is presented in Fig. S2D. The I-III peaks correspond to the vibration peaks of Ti-Al, while the IV-VI peaks correspond to the vibration peaks of Ti-C. Compared to Ti3AlC2, the I-III peaks of Ti3C2 were almost absent, and only three distinct IV-VI peaks were observed, indicating the selective etching of "Al" and the presence of functional groups such as =O, -OH, and -F. This observation is consistent with the Raman peaks reported for Ti3C2 in the literature([Zhao et al., 2021](#_ENREF_54)). Therefore, we can infer that the Ti3C2 nanosheets were successfully obtained.


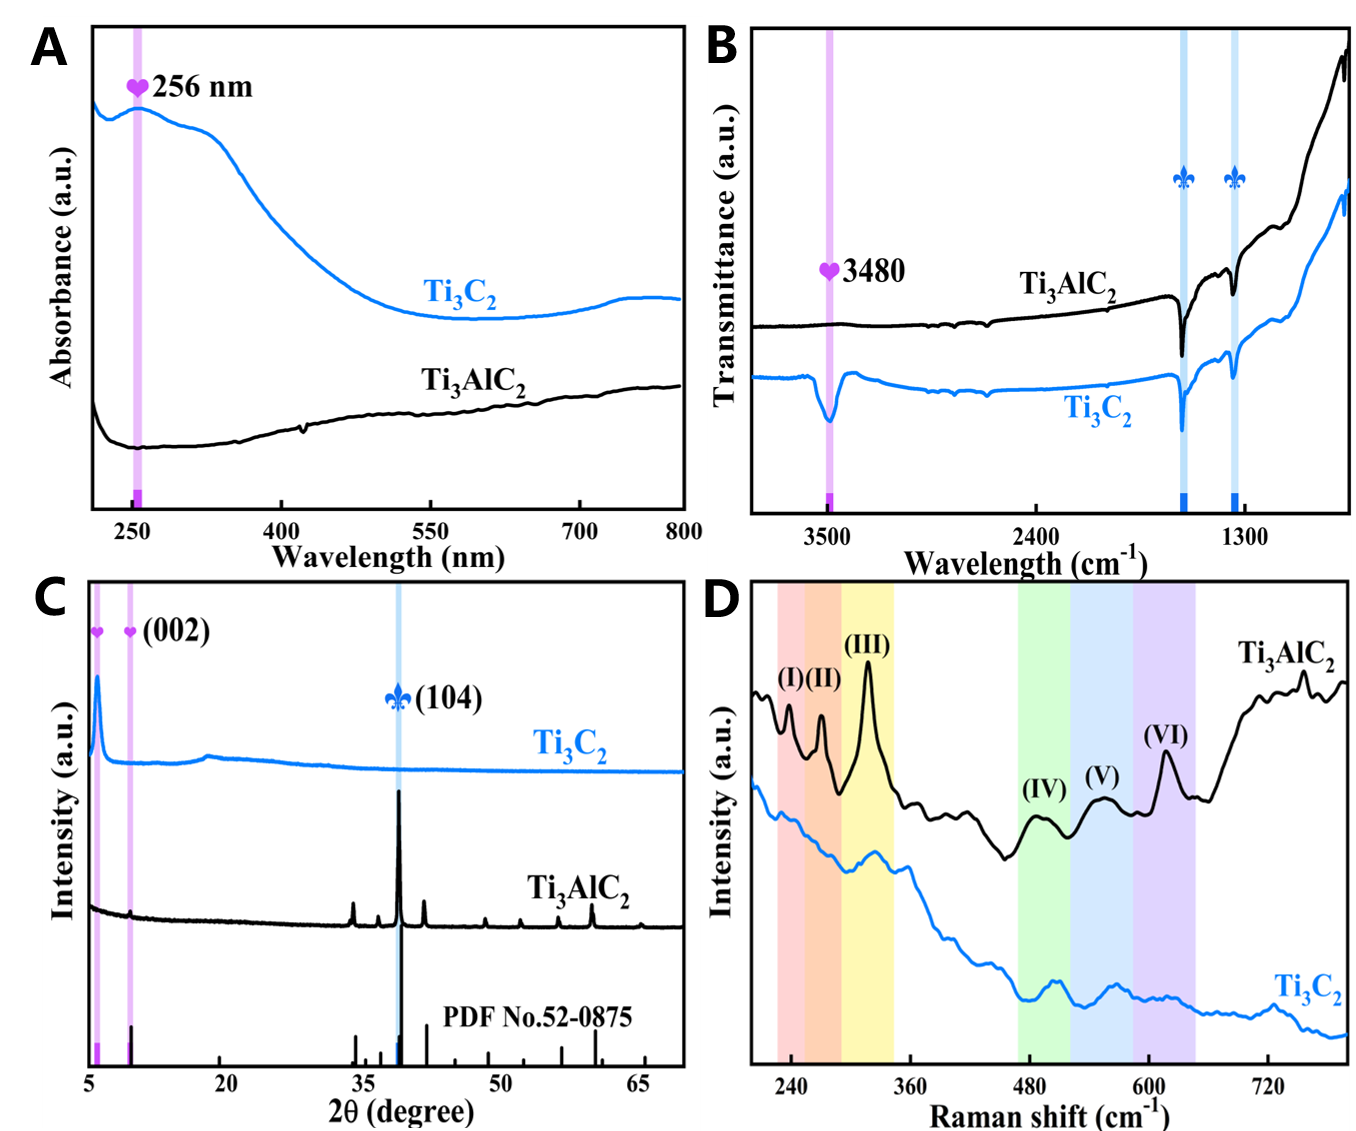


**Fig. S2** UV-vis (A), FTIR (B), XRD (C) and Raman (D) spectra of Ti3AlC2 and Ti3C2 nanosheets

**3.2 Electrical properties of dual-channel SPEs**

The dual working electrodes of SPEs were denoted as SPE(a) and SPE(b). Fig. S3A and C depict the CV curves of SPE(a) and SPE(b) at various scan rates ranging from 100 to 800 mV·s-1. The results indicate a gradual increase in the redox peak current of both SPE(a) and SPE(b) with increasing scan rate, suggesting a reversible electrochemical reaction occurring on the surfaces of these bare electrodes ([Krishnaveni and Ganesh, 2021](#_ENREF_23)). To further analyze this behavior, a fitting method was employed to establish a linear relationship between the anodic or cathodic peak current and the square root of the scan rate (v1/2) values for SPE(a) and SPE(b), as illustrated in Fig. S3B and D, respectively. The correlation coefficients (R2) for the anodic and cathodic fitting curves of SPE(a) were determined to be 0.999 39 and 0.994 76, respectively. Similarly, the R2 values for the anodic and cathodic fitting curves of SPE(b) were 0.999 38 and 0.995 27, respectively. These values, approaching 1, indicate a strong correlation between the redox peak current and v1/2. Consequently, both bare SPE(a) and SPE(b) demonstrate excellent stability and reversibility in their electrochemical behavior.


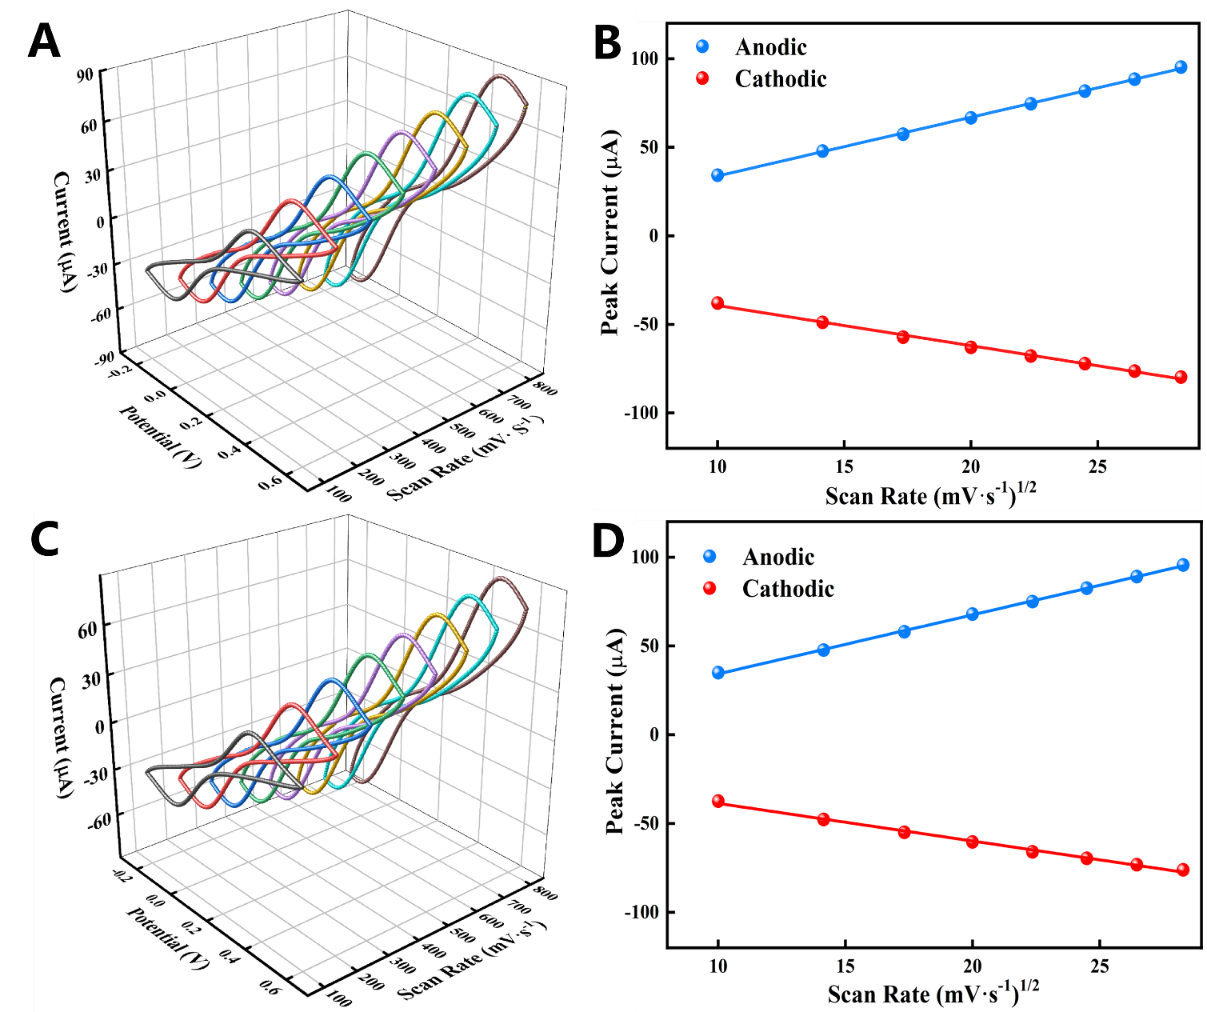


**Fig. S3** CVs of bare SPE(a) (A) and SPE(b) (C); The linear relationship between redox peak currents and all scan rate (v1/2) of SPE(a) (B) and SPE(b) (D).

**Table S1** A brief comparison of proposed label-free EIs designed for PSA or PSMA detection

| Target analyte | Electrode | Detection  technique | Detection range (ng·mL-1) | LOD (ng·mL-1) | Reference |
| --- | --- | --- | --- | --- | --- |
| PSA | IPAa/Au | EIS | 1×10-5 - 1×105 | 3.3×10-6 | ([Mwanza et al., 2022](#_ENREF_35)) |
| PSA | Au NFsb/SPCEc | CV | 0 - 100 | 0.28 | ([Dou et al., 2022](#_ENREF_10)) |
| PSA | MoS2/GCEd | SWV | 1×10-6 - 500 | 2.5×10-6 | ([Yan et al., 2022](#_ENREF_52)) |
| PSA | Au-GO/GCE | EIS | 0.5 - 7 | 0.85 | ([Aayanifard et al., 2021](#_ENREF_1)) |
| PSA | Fe-Cu LDHe/rGO/PGEf | CV & EIS | 1×10-4 - 1×104 | 6.324×10-5 | ([Ghasemi et al., 2023](#_ENREF_13)) |
| PSA | APBA/6-PICA/GCEg | SWV | 0.5 - 100 | 0.11 | ([Martínez-Rojas et al., 2021](#_ENREF_33)) |
| PSA | MWCNTh/Au NPs/SPE | DPVi | 1 - 100 | 1×10-3 | ([Alnaimi et al., 2022](#_ENREF_3)) |
| PSA | GAj/Au NPs/Nafion/SPE | EIS | 0.05 - 50 | 0.0306 | ([Hu et al., 2023](#_ENREF_17)) |
| PSA | Ag/ds-DNA/PEDOT/SPE | EIS | 1×10-4 - 100 | 1.7×10-5 | ([Liu, 2023](#_ENREF_28)) |
| PSMA | Au NP/SPGE | DPV | 0 - 5 | 0.47 | ([Kabay et al., 2022](#_ENREF_20)) |
| PSMA | P(Thi-diSuc)k/ITO | CV | 1.5×10-5 - 1.44 ×10-2 | 6.4×10-6 | ([Aydın et al., 2021](#_ENREF_5)) |
| PSMA | N-Au NPsl/ITO | DPV | 19 - 6,250 | 12.5 | ([Seenivasan et al., 2017](#_ENREF_40)) |
| PSMA | Au Np-ConA/AI-IDEm | Capacitance | 0.01 - 100 | 0.01 | ([Subramani et al., 2021](#_ENREF_44)) |
| PSMA | CNFn/Ag | EIS | 10 - 200 | 9.5 | ([Rezaei et al., 2022](#_ENREF_39)) |
| PSA | Fe3O4-GO/SPE | Amperometry | 9.8×10-3 - 0.624 | 4.9×10-3 | ([Sharafeldin et al., 2017](#_ENREF_42)) |
| PSMA |  |  | 15.6 - 7.8 | 1.56×10-2 |  |
| PSA | Ti3C2-Ag NPs/SPE | CV | 0.1 - 1,000 | 0.045 | This work |
| PSMA |  |  | 0.1 - 1,000 | 0.041 |  |

Abbreviations:

a: Isophthalic acid (IPA), b: Gold nanoflowers (Au NFs), c: Screen-printed carbon electrodes (SPCE), d: Glass carbon electrode (GCE), e: Layered double hydroxide (LDH), f: Pencil graphite electrode (PGE), g: Aminophenylboronic/poly-indole-6-carboxylic acid-modified electrode (APBA/6-PICA/GCE), h: Multi-walled carbon nanotubes (MWCNT), i: Differential pulse voltammetry (DPV), j: Graphene aerogel (GA), k: Conjugated di-succinimide substituted polythiophene (P(ThidiSuc)) polymer modified indium tin oxide (P(Thi-diSuc)/ITO), l: Cysteamine capped gold nanoparticles (N-Au NPs), m: Gold nanoparticle-concanavalin A modified aluminium-interdigitated electrode (Au Np-ConA/AI-IDE), n: Carbon nanofiber (CNF).

**References**

Aayanifard, Z., Alebrahim, T., Pourmadadi, M., Yazdian, F., Dinani, H.S., Rashedi, H., Omidi, M., 2021. Eng. Life Sci. 21(11), 739-752.

Alnaimi, A., Al-Hamry, A., Makableh, Y., Adiraju, A., Kanoun, O., 2022. Biosensors (Basel) 12(12), 1130.

Aydın, E.B., Aydın, M., Sezgintürk, M.K., 2021. Macromol. Biosci. 21(10), 2100173.

Chen, W., Kong, S., Chen, F., Cai, W., Wang, J., Du, L., Huang, Y., Wu, C., 2020. Mat. Lett. 260, 126972.

Ding, L., Wei, Y., Wang, Y., Chen, H., Caro, J., Wang, H., 2017. Angew. Chem. Int. Ed. 56(7), 1825-1829.

Dou, Y., Li, Z., Su, J., Song, S., 2022. Biosensors (Basel) 12(5), 259.

Ghasemi, Y., Sadeghi, M., Ehzari, H., Derakhshankhah, H., 2023. Microchem. J. 195, 109460.

Hu, T., Bai, Z., Wang, D., Bai, Y., Li, X., Ni, Z., 2023. Microchem. J. 195, 109436.

Kabay, G., Yin, Y., Singh, C.K., Ahmad, N., Gunasekaran, S., Mutlu, M., 2022. Sens. Actuators B Chem. 360, 131667.

Krishnaveni, P., Ganesh, V., 2021. Sci. Rep. 11(1), 7663.

Liu, Y., 2023. Int. J. Electrochem. Sci. 18(3), 100028.

Martínez-Rojas, F., Castañeda, E., Armijo, F., 2021. J. Electroanal. Chem. 880, 114877.

Mwanza, D., Adeniyi, O., Tesfalidet, S., Nyokong, T., Mashazi, P., 2022. J. Electroanal. Chem. 927, 116983.

Pandey, R.P., Rasool, K., Madhavan, V.E., Aïssa, B., Gogotsi, Y., Mahmoud, K.A., 2018. J. Mater. Chem. A 6(8), 3522-3533.

Rezaei, Z., Alemzadeh, I., Vossoughi, M., 2022. Polym. Adv. Technol. 33(6), 1967-1977.

Seenivasan, R., Singh, C.K., Warrick, J.W., Ahmad, N., Gunasekaran, S., 2017. Biosens. Bioelectron. 95, 160-167.

Sharafeldin, M., Bishop, G.W., Bhakta, S., El-Sawy, A., Suib, S.L., Rusling, J.F., 2017. Biosens. Bioelectron. 91, 359-366.

Subramani, I.G., Ayub, R.M., Gopinath, S.C.B., Perumal, V., Fathil, M.F.M., Md Arshad, M.K., 2021. Taiwan Inst. Chem. Eng. 120, 9-16.

Yan, R., Lu, N., Han, S., Lu, Z., Xiao, Y., Zhao, Z., Zhang, M., 2022. Biosens. Bioelectron. 197, 113797.

Zhao, N., Zhang, F., Zhan, F., Yi, D., Yang, Y., Cui, W., Wang, X., 2021. J. Mater. Sci. Technol. 67, 156-164.
